# Supplementary material
Source: PubMed Central journal article supplement (PMC3592563)
Supplement: NIHMS448919-supplement-Supplementary_Data.pdf [file NIHMS448919-supplement-Supplementary_Data.pdf]

# Supplementary Information for: A model based approach for analysis of spatial structure in genetic data

Wen-Yun Yang<sup>1,2</sup>, John Novembre<sup>1,3</sup>, Eleazar Eskin<sup>1,2,4,7,8</sup>, and Eran Halperin<sup>5,6,7</sup>

<sup>1</sup>Interdepartmental Program in Bioinformatics,

<sup>2</sup>Department of Computer Science,

<sup>3</sup>Department of Ecology and Evolutionary Biology and

<sup>4</sup>Department of Human Genetics, University of California, Los Angeles, California, USA

<sup>5</sup>International Computer Science Institute, Berkeley, California, USA

<sup>6</sup>School of Computer Science and the Department of Molecular Microbiology and Biotechnology, Tel-Aviv University, Tel-Aviv, Israel

<sup>7</sup>These authors contribute equally to this work

<sup>8</sup>Correspondence should be addressed to E.E. (eeskin@cs.ucla.edu)

## Supplementary Figures

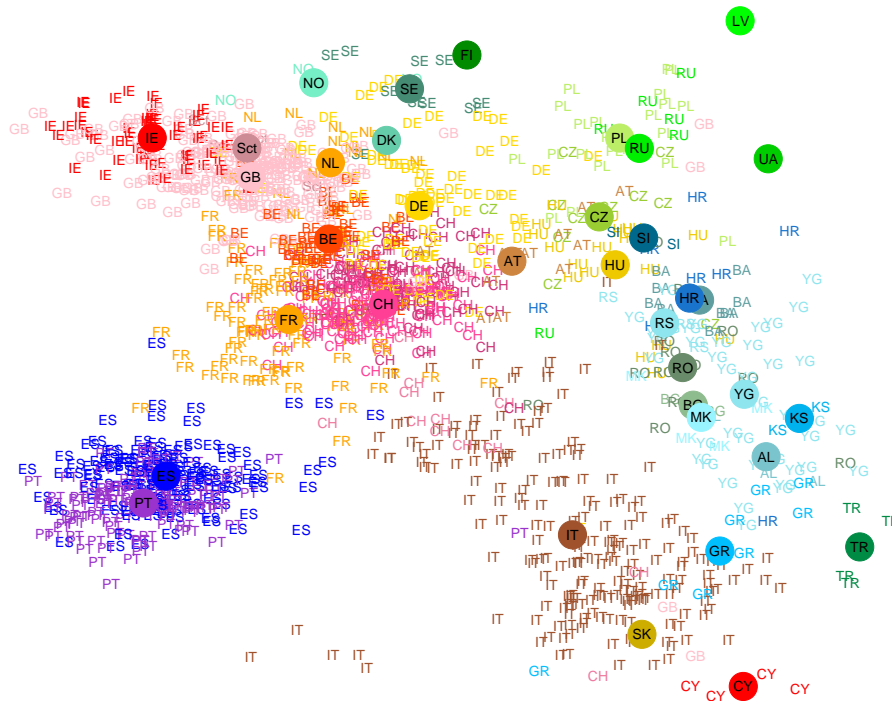

Supplementary Figure 1: Mapping results on POPRES data set by placing individuals using country of origin information. A 10-fold cross validation is performed. In each run, we fit the slope function using the true location information of 90% of the individuals and predict the location for the remaining 10%.

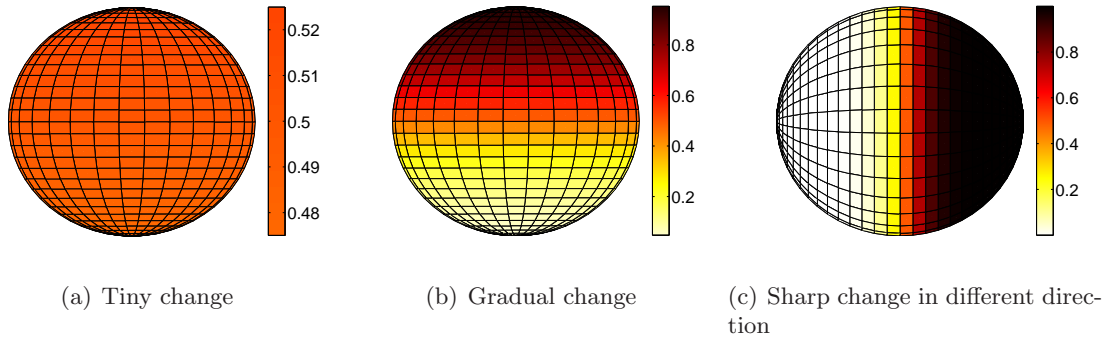

Supplementary Figure 2: Examples of the allele frequency model for a sphere. The allele frequency is represented by different colors (yellow are low allele frequencies, while red are high allele frequencies). (a) A SNP with constant allele frequency over the sphere. (b) A SNP with graduate allele frequency changes over the sphere. (c) A SNP with sharp frequency changes. The parameter  $a$  is set to  $[0, 0, 0.1]$ ,  $[0, 0, 3]$  and  $[10, 0, 0]$ , respectively and the parameter  $b$  is set to be zero in all three spheres. The sphere coordinates are drawn from a unit sphere, i.e.  $\|\vec{x}\| = 1$ .

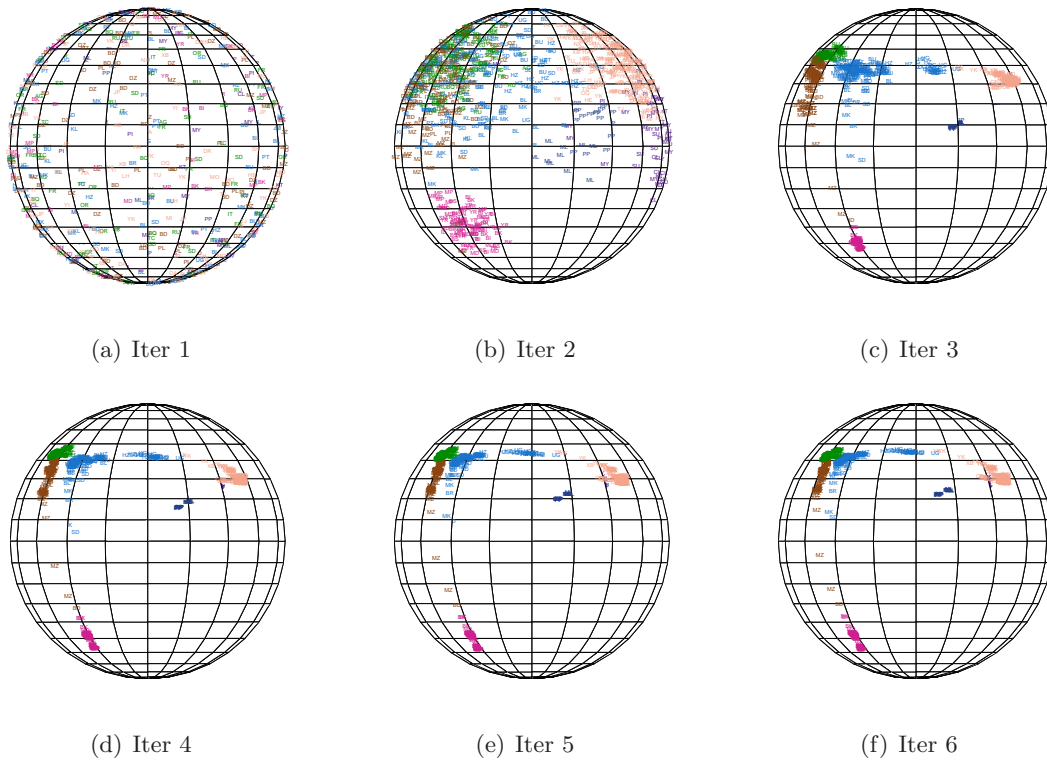

Supplementary Figure 3: Globe mapping convergence with random initialization for individuals from the HGDP data set. The colors represent the continent-level origins for each individual. Iteration 1 starts from random positioning of individuals. By iteration 4, the algorithm separates the continents.

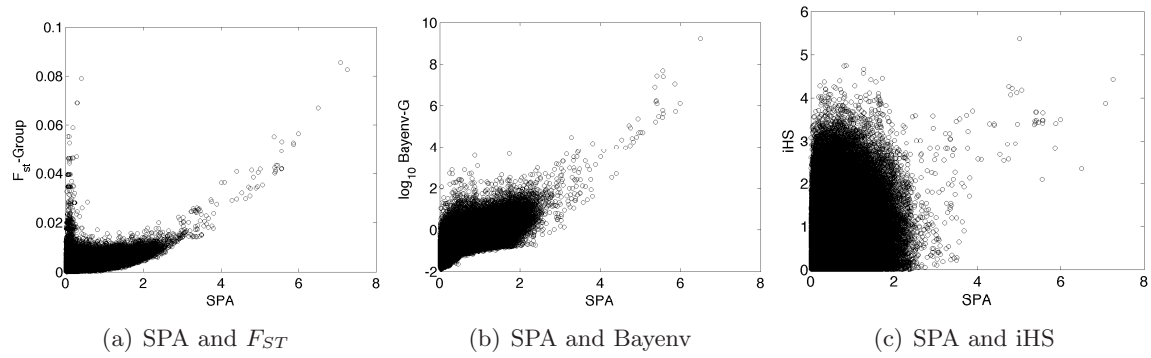

Supplementary Figure 4: Correlation between the SPA and other methods.  $F_{ST}$  and Bayenv use geographical groups to divide populations. The environmental factor in Bayenv is the individual coordinates in the first principle component.

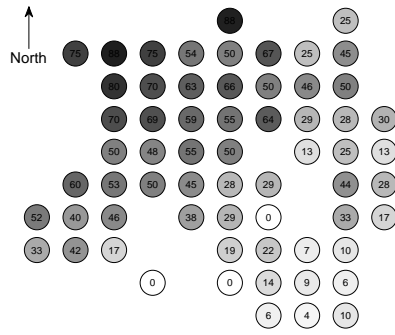

(a) *LCT*: rs6730157

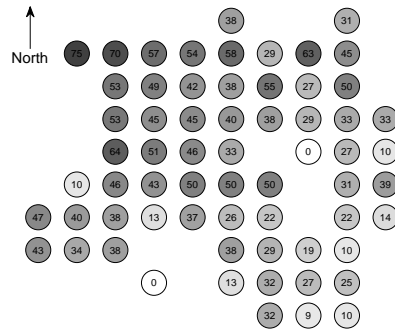

(b) *HLA*: rs9268560

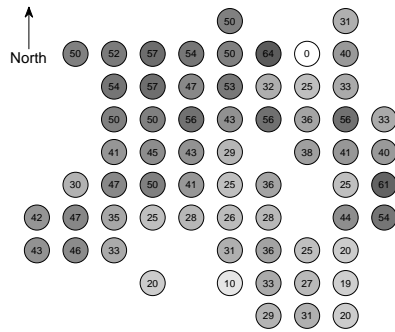

(c) *FOXP2*: rs2106900

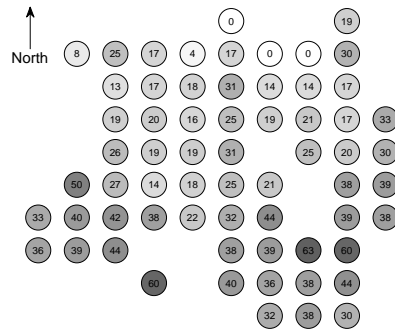

(d) *OCA2*: rs916977

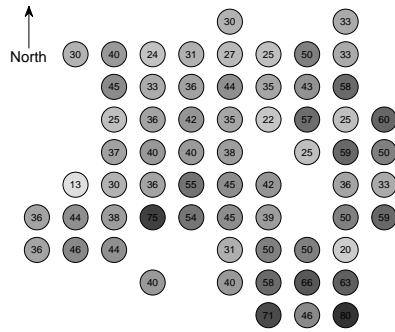

(e) *LRP1B*: rs7598314

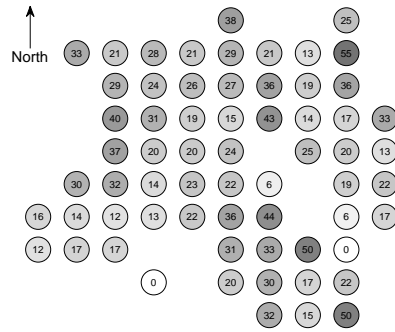

(f) Typical SNP

Supplementary Figure 5: Spatial distribution of SNPs with extreme allele frequency gradients. The grey scale stands for allele frequency: dark for high frequency and white for low frequency. The number in the circle stands for allele frequency percentage values. We divide the whole map into  $10 \times 10$  grid. We then calculate the allele frequency for each small region by averaging all individuals in the region. Regions with less than 5 individuals are removed for accurate allele frequency estimation.

## Supplementary Tables

Supplementary Table 1: Summary of SPA globe mapping results. The mean and standard deviation of each continent population are calculated based on an alignment to actual world globe. The positive and negative latitudes stand for north and south latitudes, respectively. The positive and negative longitudes stand for east and west longitude, respectively. The longitude and latitude for each continent are computed by averaging the individual spatial assignments.

| Continent          | Pred. Latitude      | Pred. Longitude      | Actual Latitude     | Actual Longitude     |
|--------------------|---------------------|----------------------|---------------------|----------------------|
| Africa             | $-44.005 \pm 4.030$ | $19.548 \pm 0.885$   | $1.845 \pm 10.977$  | $12.634 \pm 16.229$  |
| America            | $21.206 \pm 1.988$  | $-151.095 \pm 3.449$ | $9.344 \pm 16.035$  | $-82.453 \pm 18.161$ |
| Central South Asia | $37.628 \pm 3.625$  | $28.047 \pm 11.212$  | $32.051 \pm 4.722$  | $69.550 \pm 3.979$   |
| East Asia          | $30.683 \pm 2.617$  | $95.598 \pm 4.925$   | $36.685 \pm 12.841$ | $115.542 \pm 14.250$ |
| Europe             | $38.582 \pm 1.434$  | $10.630 \pm 2.751$   | $47.732 \pm 7.618$  | $13.592 \pm 16.317$  |
| Middle East        | $29.799 \pm 7.600$  | $12.581 \pm 1.277$   | $31.718 \pm 0.451$  | $29.307 \pm 12.276$  |
| Oceania            | $24.203 \pm 1.007$  | $66.530 \pm 2.189$   | $-4.741 \pm 0.984$  | $147.444 \pm 5.905$  |

Supplementary Table 2: Correlation coefficient between six methods. We check whether a SNP with top 2% scores for POPRES set or 1% scores for HapMap set in 100kb window to determine whether this window is under selection. Then we have a binary vector across the whole genome for all four methods, and we compute the correlation coefficient using the binary vector.

|                 | iHS      | $F_{ST}$ -Grp | $F_{ST}$ -Cntry | Bayenv-Grp | Bayenv-Cntry | SPA      |
|-----------------|----------|---------------|-----------------|------------|--------------|----------|
| iHS             | 1.000000 |               |                 |            |              |          |
| $F_{ST}$ -Grp   | 0.028713 | 1.000000      |                 |            |              |          |
| $F_{ST}$ -Cntry | 0.013455 | 0.401576      | 1.000000        |            |              |          |
| Bayenv-Grp      | 0.018016 | 0.305782      | 0.123768        | 1.000000   |              |          |
| Bayenv-Cntry    | 0.019460 | 0.203627      | 0.103108        | 0.333595   | 1.000000     |          |
| SPA             | 0.023986 | 0.333148      | 0.123805        | 0.446488   | 0.296796     | 1.000000 |

Supplementary Table 3: Genes with extreme gradients detected only by SPA.

| Genes               | SNP with extreme gradient | highest SPA score | Position       |
|---------------------|---------------------------|-------------------|----------------|
| MGLL                | rs782437                  | 2.88928           | chr3:128899892 |
| SCAND3,ZNF192,ZSCAN | rs6903535                 | 2.74179           | chr6:28525201  |
| FOXP2               | rs2106900                 | 2.71077           | chr7:113909742 |
| TMEM104             | rs2385067                 | 2.57703           | chr17:70321665 |
| ENY2,NUDCD1         | rs1380098                 | 2.54717           | chr8:110317808 |
| TAS2R,PRH1,PRR4     | rs2597996                 | 2.54539           | chr12:11099651 |
| MIR1244,BCL2L14     | rs4763782                 | 2.51019           | chr12:12146023 |
| ITPR1               | rs7637793                 | 2.49356           | chr3:4725558   |
| NUP153              | rs11753865                | 2.48271           | chr6:17790701  |
| ZAP70               | rs6736735                 | 2.48015           | chr2:97702865  |
| TMEM117             | rs2407790                 | 2.46361           | chr12:42717760 |
| ERC1                | rs11061714                | 2.44995           | chr12:1348831  |
| SEMA6D              | rs281297                  | 2.44008           | chr15:45472796 |
| PTK2B,DPYSL2,TRIM35 | rs6557991                 | 2.42558           | chr8:27231225  |
| SLC45A1             | rs1466654                 | 2.42438           | chr1:8298500   |
| SLC24A3             | rs4814838                 | 2.40770           | chr20:19267846 |
| SOX6                | rs7118395                 | 2.40590           | chr11:16155641 |
| SPOCK1              | rs2348605                 | 2.39459           | chr5:136838003 |
| ADAMTSL3            | rs7169595                 | 2.38401           | chr15:82196578 |
| WWOX                | rs441004                  | 2.38284           | chr16:77794331 |
| SLC26A4,LOC286002   | rs11769313                | 2.38096           | chr7:107101183 |
| NRXN3               | rs11625485                | 2.36487           | chr14:79311885 |
| ZNF19               | rs2288486                 | 2.35797           | chr16:70070535 |
| SEMA3E              | rs215302                  | 2.35116           | chr7:83051200  |
| ZDHHC2              | rs2959634                 | 2.35056           | chr8:17071223  |
| CDH7                | rs7237421                 | 2.35029           | chr18:61586240 |
| KCNIP4              | rs7689421                 | 2.33900           | chr4:20364338  |
| AK5                 | rs11162351                | 2.33449           | chr1:77717320  |
| ZAK                 | rs3754744                 | 2.33022           | chr2:173710310 |
| IDH2                | rs12443387                | 2.32722           | chr15:88453860 |
| USH2A               | rs2677112                 | 2.32663           | chr1:213891790 |
| FLJ22536            | rs2078482                 | 2.32446           | chr6:22105905  |
| ERC2                | rs7628951                 | 2.32417           | chr3:56432745  |
| PRRX1               | rs593479                  | 2.32273           | chr1:168909523 |
| RBFOX3              | rs4790055                 | 2.31235           | chr17:75001008 |
| FUT11,SEC24C        | rs3849969                 | 2.30577           | chr10:75196005 |
| GRRP1               | rs1335759                 | 2.28446           | chr1:26344330  |
| SORBS1              | rs526928                  | 2.28296           | chr10:97324281 |
| NEBL                | rs1340293                 | 2.28250           | chr10:21239171 |
| HUNK                | rs2833609                 | 2.27600           | chr21:32303489 |
| TMEM170B            | rs9469574                 | 2.27332           | chr6:11698126  |

Supplementary Table 4: A full list of regions with extreme gradients detected by SPA. The 450 (0.1% of total) SNPs with the highest scores are listed. Results of different SNPs are merged if the two SNPs are at distance smaller than 1MB.

| Genes                                                     | SNP with most extreme gradient | highest SPA score | Position        |
|-----------------------------------------------------------|--------------------------------|-------------------|-----------------|
| LCT region                                                | rs6730157                      | 7.25764           | chr2:135623558  |
| HLA-DPB1 region                                           | rs9268560                      | 3.67652           | chr6:32497490   |
| HLA-B region                                              | rs2517510                      | 3.50633           | chr6:31138101   |
| HERC2,OCA2                                                | rs916977                       | 3.42020           | chr15:26186959  |
| ADH1C                                                     | rs1789903                      | 3.07810           | chr4:100481064  |
| LOC283177                                                 | rs4592433                      | 3.06241           | chr11:133853131 |
| FAM114A1,TLR10,TLR1                                       | rs6835514                      | 3.02649           | chr4:38570775   |
| MGLL                                                      | rs782437                       | 2.88928           | chr3:128899892  |
| PLA2R1,LY75,<br>LY75-CD302,ITGB6                          | rs16844715                     | 2.83868           | chr2:160623352  |
| BNC2                                                      | rs10756762                     | 2.81414           | chr9:16553123   |
| HPS5,GTF2H1                                               | rs4150581                      | 2.76205           | chr11:18313846  |
| SCAND3,ZNF192,<br>ZSCAN16,ZSCAN23                         | rs6903535                      | 2.74179           | chr6:28525201   |
| TWSG1                                                     | rs8091539                      | 2.73925           | chr18:9398889   |
| FOXP2                                                     | rs2106900                      | 2.71077           | chr7:113909742  |
| SCN2A,SCN1A                                               | rs1461197                      | 2.67766           | chr2:166632718  |
| RFPL1,RFPL1S                                              | rs5763240                      | 2.65562           | chr22:28166926  |
| LRP1B                                                     | rs7598314                      | 2.63123           | chr2:142250435  |
| SYT1                                                      | rs7308297                      | 2.62652           | chr12:78301975  |
| TMEM104                                                   | rs2385067                      | 2.57703           | chr17:70321665  |
| ZFAND3                                                    | rs10485029                     | 2.56609           | chr6:37907682   |
| ENY2,NUDCD1                                               | rs1380098                      | 2.54717           | chr8:110317808  |
| TAS2R50,TAS2R19,<br>TAS2R31,TAS2R20,<br>PRH1,PRR4,TAS2R46 | rs2597996                      | 2.54539           | chr12:11099651  |
| MIR1244,BCL2L14,LRP6                                      | rs4763782                      | 2.51019           | chr12:12146023  |
| SUCLG2                                                    | rs1352657                      | 2.50426           | chr3:67535708   |
| CHMP1A,DPEP1,C16orf55                                     | rs164749                       | 2.50165           | chr16:88235725  |
| ITPR1                                                     | rs7637793                      | 2.49356           | chr3:4725558    |
| NUP153                                                    | rs11753865                     | 2.48271           | chr6:17790701   |
| ZAP70                                                     | rs6736735                      | 2.48015           | chr2:97702865   |
| EHBP1,OTX1                                                | rs11125946                     | 2.47946           | chr2:63151654   |
| TMEM117                                                   | rs2407790                      | 2.46361           | chr12:42717760  |
| RBFOX1                                                    | rs11645481                     | 2.45097           | chr16:7021094   |
| ERC1                                                      | rs11061714                     | 2.44995           | chr12:1348831   |
| Continued on Next Page...                                 |                                |                   |                 |



| Genes               | SNP with most extreme gradient | highest SPA score | Position       |
|---------------------|--------------------------------|-------------------|----------------|
| ACOT6,ACOT4         | rs4903128                      | 2.44437           | chr14:73145688 |
| SEMA6D              | rs281297                       | 2.44008           | chr15:45472796 |
| PTK2B,DPYSL2,TRIM35 | rs6557991                      | 2.42558           | chr8:27231225  |
| LOC729234           | rs1917890                      | 2.42547           | chr2:96035728  |
| SLC45A1             | rs1466654                      | 2.42438           | chr1:8298500   |
| SLC24A3             | rs4814838                      | 2.40770           | chr20:19267846 |
| SOX6                | rs7118395                      | 2.40590           | chr11:16155641 |
| LOC732275           | rs8051237                      | 2.40286           | chr16:84939020 |
| LRRFIP1             | rs6754972                      | 2.39608           | chr2:238206505 |
| SPOCK1              | rs2348605                      | 2.39459           | chr5:136838003 |
| ADAMTSL3            | rs7169595                      | 2.38401           | chr15:82196578 |
| WVOX                | rs441004                       | 2.38284           | chr16:77794331 |
| SLC26A4,LOC286002   | rs11769313                     | 2.38096           | chr7:107101183 |
| EMILIN2             | rs592120                       | 2.38076           | chr18:2875118  |
| VAV3                | rs10494081                     | 2.37404           | chr1:108203626 |
| NRXN3               | rs11625485                     | 2.36487           | chr14:79311885 |
| ZNF19               | rs2288486                      | 2.35797           | chr16:70070535 |
| SEMA3E              | rs215302                       | 2.35116           | chr7:83051200  |
| ZDHHC2              | rs2959634                      | 2.35056           | chr8:17071223  |
| CDH7                | rs7237421                      | 2.35029           | chr18:61586240 |
| FOXN3               | rs1952182                      | 2.34064           | chr14:88978953 |
| KCNIP4              | rs7689421                      | 2.33900           | chr4:20364338  |
| AK5                 | rs11162351                     | 2.33449           | chr1:77717320  |
| ZAK                 | rs3754744                      | 2.33022           | chr2:173710310 |
| IDH2                | rs12443387                     | 2.32722           | chr15:88453860 |
| USH2A               | rs2677112                      | 2.32663           | chr1:213891790 |
| FLJ22536            | rs2078482                      | 2.32446           | chr6:22105905  |
| ERC2                | rs7628951                      | 2.32417           | chr3:56432745  |
| ITGAX               | rs1106398                      | 2.32299           | chr16:31277953 |
| PRRX1               | rs593479                       | 2.32273           | chr1:168909523 |
| RBFOX3              | rs4790055                      | 2.31235           | chr17:75001008 |
| VAT1L               | rs33967759                     | 2.30990           | chr16:76546435 |
| FUT11,SEC24C        | rs3849969                      | 2.30577           | chr10:75196005 |
| UGT2B11             | rs6817250                      | 2.28873           | chr4:70123190  |
| GRRP1               | rs1335759                      | 2.28446           | chr1:26344330  |
| SORBS1              | rs526928                       | 2.28296           | chr10:97324281 |
| NEBL                | rs1340293                      | 2.28250           | chr10:21239171 |
| LOC100188947        | rs12246543                     | 2.27656           | chr10:93291408 |
| HUNK                | rs2833609                      | 2.27600           | chr21:32303489 |
| TMEM170B            | rs9469574                      | 2.27332           | chr6:11698126  |

## Supplementary Notes

### Newton's method for optimizing SPA likelihood function

Newton's method is a widely known algorithm for minimizing a convex function. In each iteration, it needs the first and second derivatives to determine the search direction. For  $x_i$  in (3), the first and second derivatives can be efficiently calculated as follows

$$\begin{aligned}\frac{\partial L}{\partial x_i} &= -\sum_j [g_{ij}(1-f_{ij}) - (2-g_{ij})f_{ij}] \cdot a_j \\ \frac{\partial^2 L}{\partial x_i^2} &= \sum_j 2f_{ij}(1-f_{ij})a_j a_j^T\end{aligned}$$

Similarly, for  $a_j$  and  $b_j$  in (4) those can be calculated as follows

$$\begin{aligned}\frac{\partial L}{\partial a_j} &= -\sum_i [g_{ij}(1-f_{ij}) - (2-g_{ij})f_{ij}] \cdot x_i \\ \frac{\partial L}{\partial b_j} &= -\sum_i [g_{ij}(1-f_{ij}) - (2-g_{ij})f_{ij}]\end{aligned}$$

$$\begin{aligned}\frac{\partial^2 L}{\partial a_j^2} &= \sum_i 2f_{ij}(1-f_{ij})x_i x_i^T \\ \frac{\partial^2 L}{\partial b_j^2} &= \sum_i 2f_{ij}(1-f_{ij}).\end{aligned}$$

The computational complexity for each iteration of this algorithm is  $O(NLK^2)$ . The total computational time depends on the number of iterations for the algorithm to converge. In the data sets we analyzed in this paper, we used 10 to 20 iterations.

### Pseudo-Newton's method for admixed individual positioning

To achieve fast convergence for the admixed individual positioning problem, we again use Newton's method to optimize the log-likelihood function (5). The first and second derivatives in  $x$  and  $y$  up to a constant can be computed as follows:

$$\begin{aligned}\frac{\partial L}{\partial x} &= \sum_j [I(g_j=2)(1-p_j) + I(g_j=1)t_1 + I(g_j=0)(-p_j)] a_j \\ \frac{\partial^2 L}{\partial x^2} &= \sum_j [I(g_j=2)(1-p_j)p_j + I(g_j=1)t_2 + I(g_j=0)(1-p_j)p_j] (-a_j a_j^T) \\ \frac{\partial^2 L}{\partial x \partial y} &= \sum_j I(g_j=1) \left[ \frac{m_j(1-m_j)(1-2m_j)p_j(1-p_j)(1-2p_j)}{[(1-m_j)p_j + (1-p_j)m_j]^2} + \frac{2m_j(1-m_j)p_j(1-p_j)}{(1-m_j)p_j + (1-p_j)m_j} \right] (-a_j a_j^T)\end{aligned}$$

where  $I$  is an indicator function equal to one if the condition holds and zero otherwise, and

$$t_1 = \frac{(1 - 2m_j)(1 - p_j)p_j}{p_j(1 - m_j) + m_j(1 - p_j)}$$

$$t_2 = (1 - 2m_j) \frac{\frac{(1-m_j)p_j}{1-p_j} - \frac{m_j(1-p_j)}{p_j}}{\left(\frac{1-m_j}{1-p_j} + \frac{m_j}{p_j}\right)^2}$$

Note that the first derivative for  $y$  and second derivative for  $y$  would be the same with above for  $x$  by exchanging  $m_j$  and  $p_j$ .

One minor issue about the objective function in (5) is that the function is not concave. Thus, directly using Newton's method will suffer from numerical problem employed a pseudo-Newton's method [1] to overcome this non-concavity while maximally preserving the advantages of Newton's method. Instead of directly using the Hessian matrix  $H$ , we subtract a constant matrix to make it strictly negative definite, i.e.,  $H' = H - \delta I$  where  $I$  is an identity matrix. This modification to Newton's method enables the algorithm to converge smoothly to a local optimal for a non-concave problem.

## Abbreviations

The abbreviations for Europe (**Fig. 2**) are: AL, Albania; AT, Austria; BA, Bosnia-Herzegovina; BE, Belgium; BG, Bulgaria; CY, Cyprus; CZ, Czech Republic; DE, Germany; DK, Denmark; ES, Spain; FI, Finland; FR, France; GB, United Kingdom; GR, Greece; HR, Croatia; HU, Hungary; IE, Ireland; IT, Italy; KS, Kosovo; LV, Latvia; MK, Macedonia; NO, Norway; NL, Netherlands; PL, Poland; PT, Portugal; RO, Romania; RS, Serbia and Montenegro; RU, Russia; Sct, Scotland; SE, Sweden; SI, Slovenia; SK, Slovakia; SZ, Switzerland; TR, Turkey; UA, Ukraine; YG, Yugoslavia.

The abbreviations for the globe map (**Fig. 3**) are: AG, Adygei; BL, Balochi; BK, BantuKenya; BS, BantuSouthAfrica; BQ, Basque; BD, Bedouin; BI, BiakaPygmy; BR, Brahui; BU, Burusho; CB, Cambodian; CL, Colombian; DA, Dai; DR, Daur; DZ, Druze; FR, French; HA, Han; HN, Han-NChina; HZ, Hazara; HE, Hezhen; IT, Italian; JP, Japanese; KL, Kalash; KT, Karitiana; LH, Lahu; MK, Makrani; MD, Mandenka; MY, Maya; MP, MbutiPygmy; ML, Melanesian; MI, Miao; MO, Mongola; MZ, Mozabite; NX, Naxi; OR, Orcadian; OQ, Oroqen; PL, Palestinian; PP, Papuan; PT, Pathan; PI, Pima; RU, Russian; SN, San; SD, Sardinian; SH, She; SD, Sindhi; SU, Surui; TU, Tu; TJ, Tujia; TC, Tuscan; UG, Uygur; XB, Xibo; YK, Yakut; YI, Yi; YR, Yoruba;

## References

- [1] Nocedal, J. and Wright, S. J. *Numerical Optimization*. Springer, New York, USA, (2000).
